# Supplementary material
Source: PubMed Central journal article supplement (PMC2913185)

Biophysical Journal, Volume 00

**Supporting Material**

**Non-invasive Measurements of Integrin Microclustering under Altered Membrane  
Cholesterol Levels**

Deepak Dibya, Neha Arora, and Emily A Smith

**Table S1.** Summation of the percent relative error obtained from the Amplex Red calibration curves using the indicated weighting model. Weighting  $1/[\text{cholesterol}]^2$  was used to construct all Amplex Red calibration plots.

| weighting model                              | $\Sigma$ (% relative error) |
|----------------------------------------------|-----------------------------|
| no weighting                                 | 3891                        |
| $1/[\text{cholesterol}]^{1/2}$               | 1598                        |
| $1/[\text{cholesterol}]$                     | 850                         |
| <b><math>1/[\text{cholesterol}]^2</math></b> | <b>672</b>                  |
| $1/(\text{fluorescence intensity})^{1/2}$    | 1738                        |
| $1/(\text{fluorescence intensity})$          | 929                         |
| $1/(\text{fluorescence intensity})^2$        | 731                         |

**Figure S1.** Chromatograms of the lipid extract from transformed *Drosophila* S2 cells expressing  $\alpha$ PS2C $\beta$ PS integrins. Lipid extracts were obtained with the Bligh-Dyer method and were analyzed using high performance liquid chromatography (HPLC) with a UV-Vis detector (Agilent, USA). A reverse phase C-18 column (ZORBAX Eclipse XDB-C18, 4.6x150mm, 5  $\mu$ m) was used with a flow rate of 1.0 ml/min. The absorbance was monitored at 205 nm wavelength. The mobile phase solvents consisted of 3% water and the remaining 97% consisted of acetonitrile/methanol (1:1, v/v). 5  $\mu$ L of the lipid extract was injected into the column. Traces represent native lipid extract (black) and lipid extract spiked with a cholesterol standard (red). Cholesterol was found to be the main sterol in the cells used in these studies.

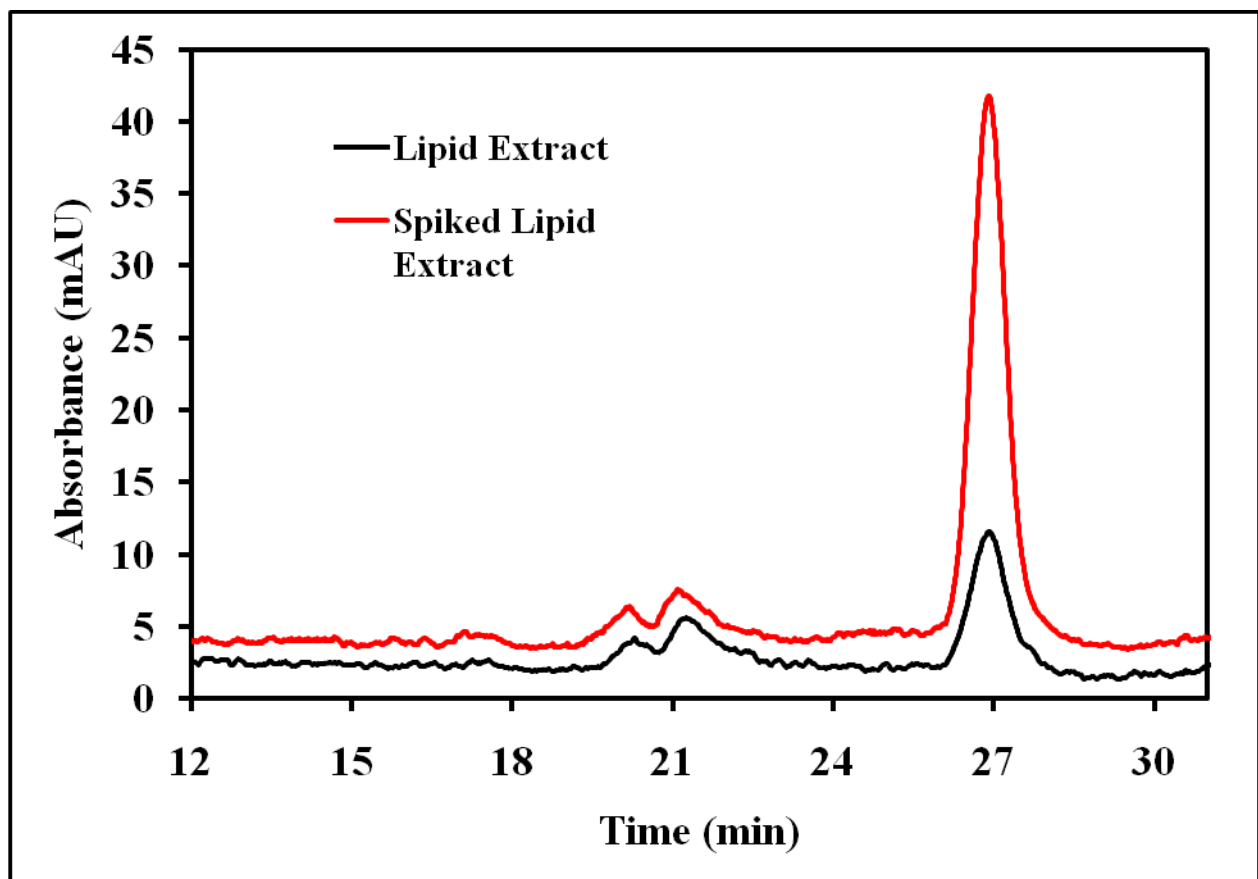

**Figure S2.** Normalized fluorescence recovery curves representing the average of ten replicate measurements (symbols). The fluorescence is from a carbocyanine lipid mimetic, DiD. The curves have been photobleach corrected by dividing the fluorescence intensity of the bleached spot by the fluorescence intensity of a non-photobleached spot approximately 20 pixels away. The data are fit to a double exponential curve (dotted lines, cholesterol depleted cells; solid lines, control and cholesterol restored cells). The fit parameters are discussed in the text.

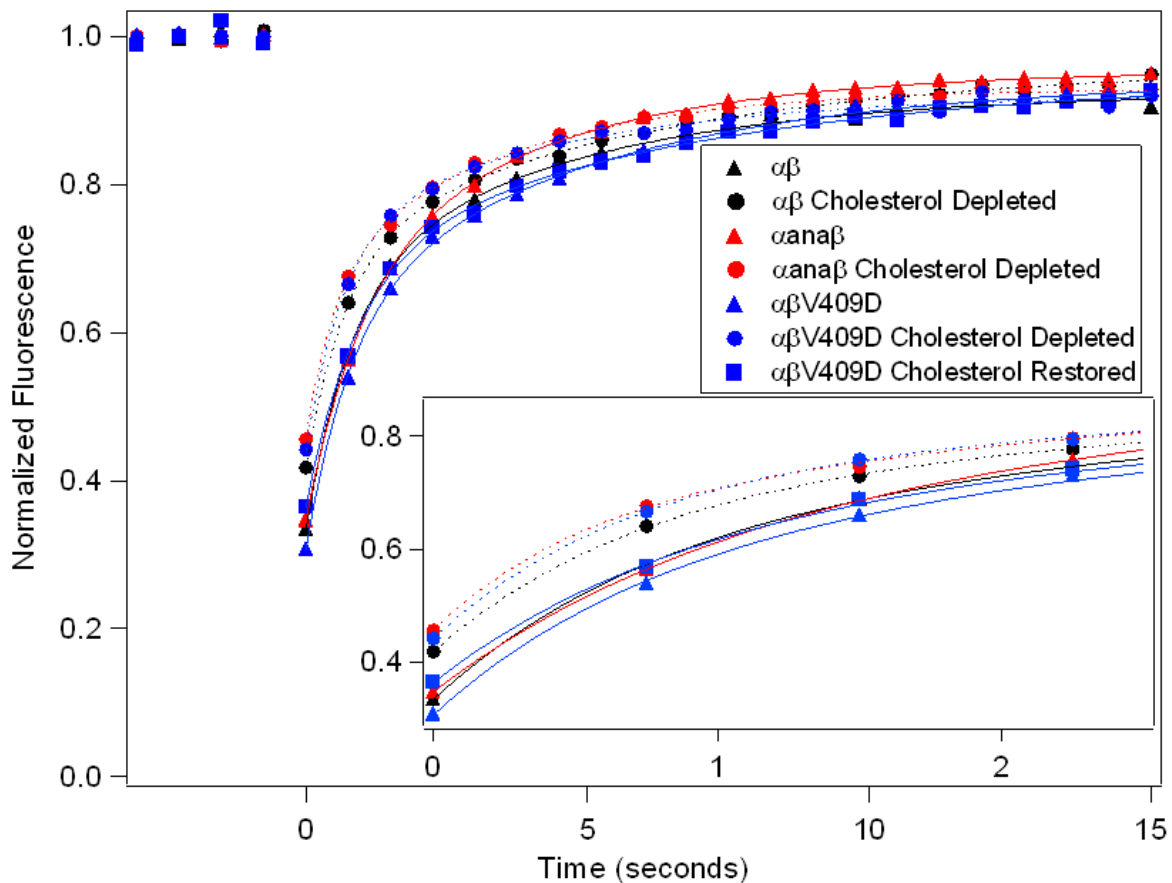

Supplement: mmc1.pdf [file mmc1.pdf]
